# Supplementary material for: Ag@SrTiO3 nanocomposite for super photocatalytic degradation of organic dye and catalytic reduction of 4-nitrophenol
Source: Royal Society of Chemistry journal article supplement (doi:10.1039/c7nj00522a), 2017-01-01
Supplement: c7nj00522a1.pdf [file c7nj00522a1.pdf]

Supporting Information

**Ag@SrTiO<sub>3</sub> nanocomposite for super photocatalytic degradation of organic dye  
and catalytic reduction of 4-nitrophenol**

Zhengcui Wu,\* Yali Zhang, Xia Wang and Zexian Zou

Anhui Key Laboratory of Molecule-Based Materials, The Key Laboratory of Functional Molecular Solids,

Ministry of Education, College of Chemistry and Materials Science, Anhui Normal University, Wuhu

241000, P. R. China.

\*Corresponding author. E-mail: zhengcui@mail.ahnu.edu.cn.

Tel.: +86 553 3869302; Fax: +86 553 3869302.

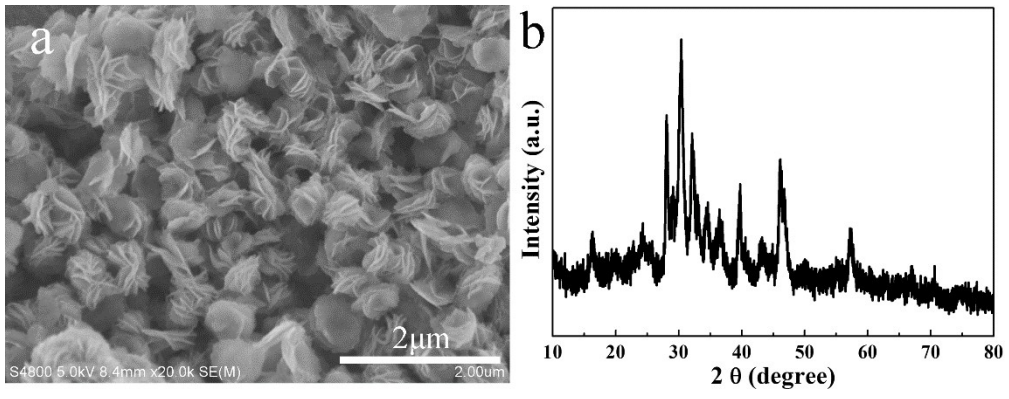

**Fig. S1** The FESEM image (a) and XRD pattern (b) of the SrTiO<sub>3</sub> precursor.

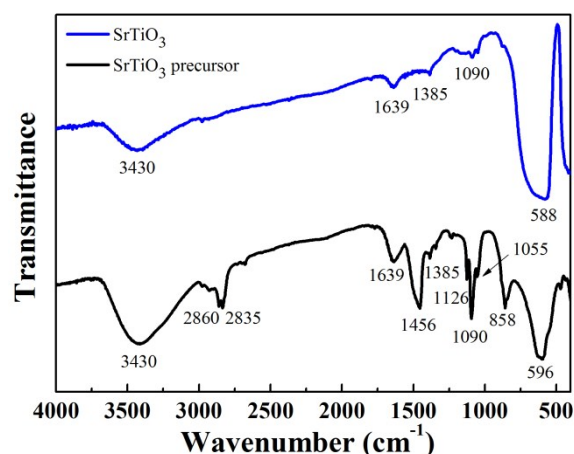

**Fig. S2** FTIR spectra of the SrTiO<sub>3</sub> precursor and pristine SrTiO<sub>3</sub>.

For the SrTiO<sub>3</sub> precursor, the broad absorption peak at 3430 cm<sup>-1</sup> and the band at 1639 cm<sup>-1</sup> are individually the stretching and bending vibrational mode of O — H bond, confirming the product absorbed a small amount of water molecules or bonded some hydroxyl groups. The absorption peaks observed at 2860 and 2835 cm<sup>-1</sup> were associated with the stretching vibration of C — H bond. The bands at 1456 and 1385 cm<sup>-1</sup> are attributed to the bending vibration of C — H bond. The bands at 1126, 1090 and 1055 cm<sup>-1</sup> can be attributed to the stretching vibration of C — O or C — N bond. The bands at 858 and 596 cm<sup>-1</sup> are the stretching vibration of Sr — O and Ti — O bond, respectively. Therefore, the FTIR spectrum revealed organic groups bonded on the SrTiO<sub>3</sub> precursor, suggesting it was an organic-inorganic hybrid. After calcination at 550°C for 6 h, the broad absorption peaks at 3430 and 1639 cm<sup>-1</sup> attributed to the stretching and bending vibration of O — H bond still presented, confirming some hydroxyl groups bonded on the product. The absorption peak at 1385 cm<sup>-1</sup> was associated with the bending vibration of C — H bond. The band at 1090 cm<sup>-1</sup> can be attributed to the stretching vibration of C — N bond. The band at 588 cm<sup>-1</sup> is the stretching vibration of Ti — O bond. Thus, it can be inferred that 1, 6-hexanediamine molecules were bonded on the surface of pristine SrTiO<sub>3</sub> even after calcination.

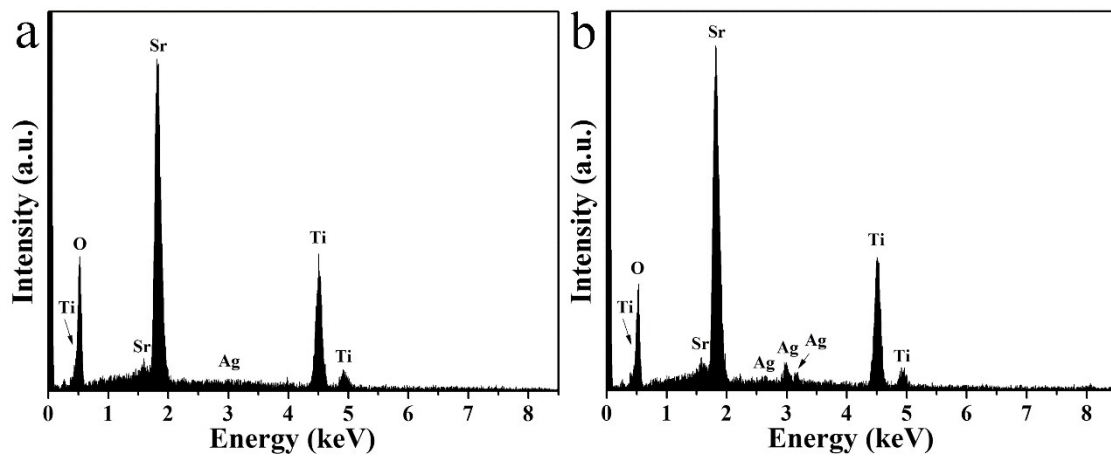

**Fig. S3** EDX spectra of 2% (a) and 10% Ag@SrTiO<sub>3</sub> (b).

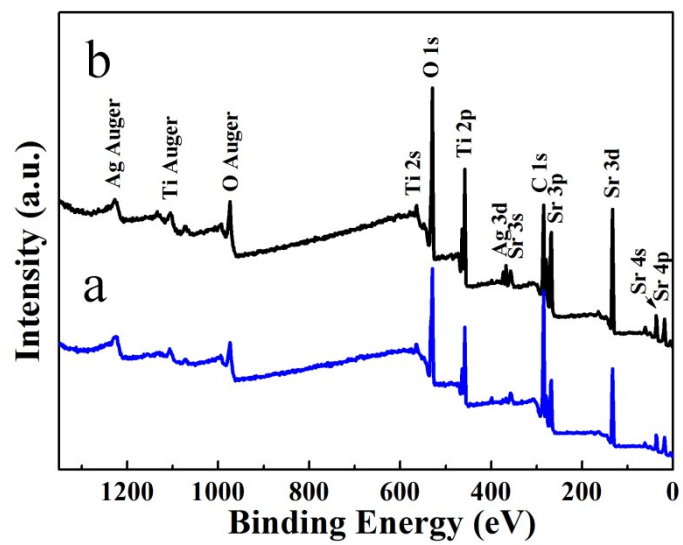

**Fig. S4** Survey XPS spectra of (a) 2% and (b) 10% Ag@SrTiO<sub>3</sub>.

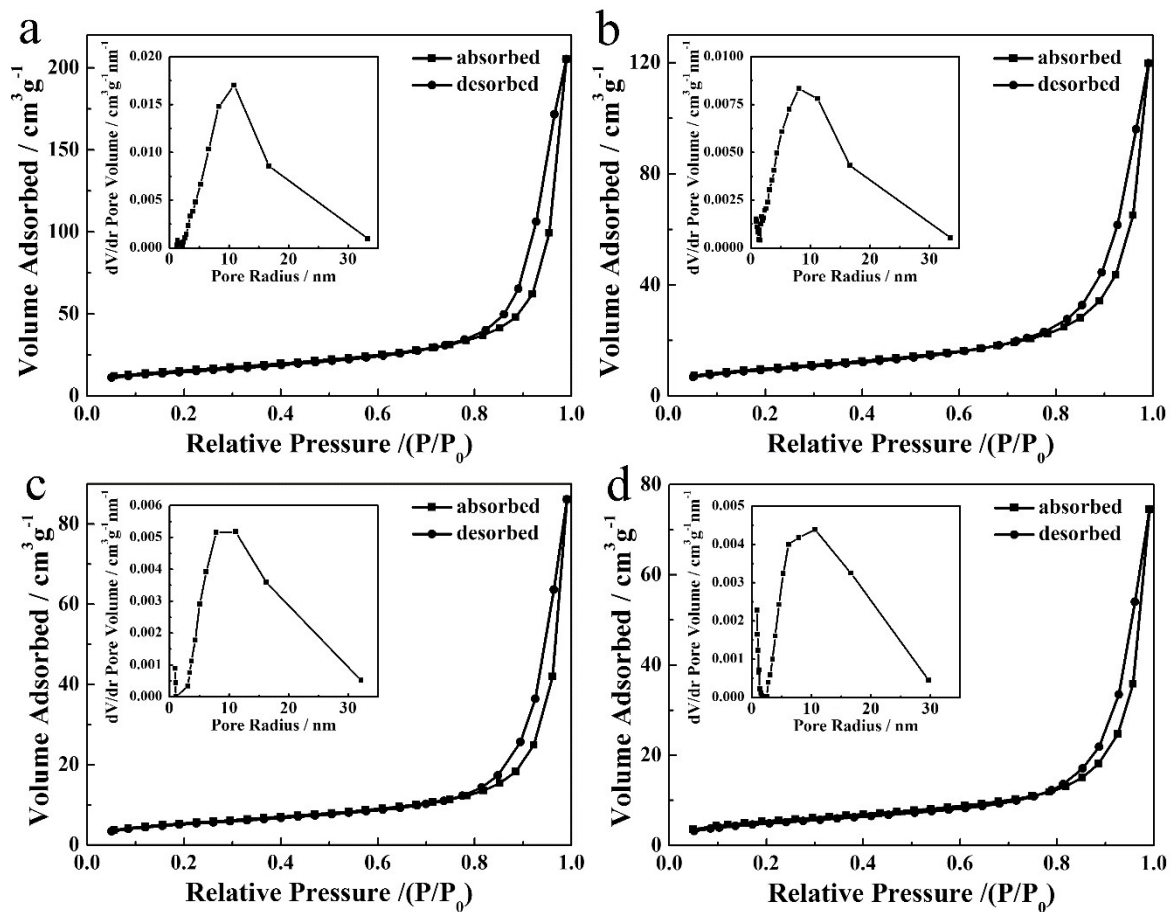

**Fig. S5** Nitrogen adsorption–desorption isotherm of the catalysts. The inset is its BJH pore-size distribution curve. (a)  $\text{SrTiO}_3$ . (b) 2%  $\text{Ag}@\text{SrTiO}_3$ . (c) 5%  $\text{Ag}@\text{SrTiO}_3$ . (d) 10%  $\text{Ag}@\text{SrTiO}_3$ .

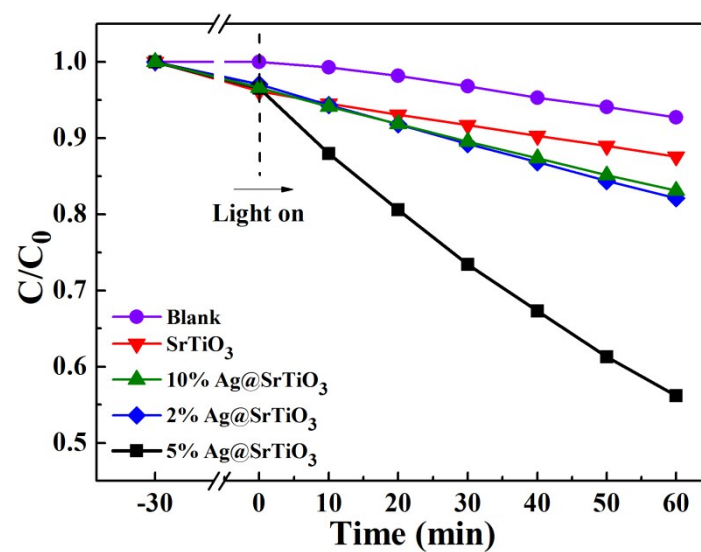

**Fig. S6** Photocatalytic degradation curves of phenol aqueous solution in the presence of the pristine  $SrTiO_3$  and  $Ag@SrTiO_3$  nanocomposites as well as the blank.

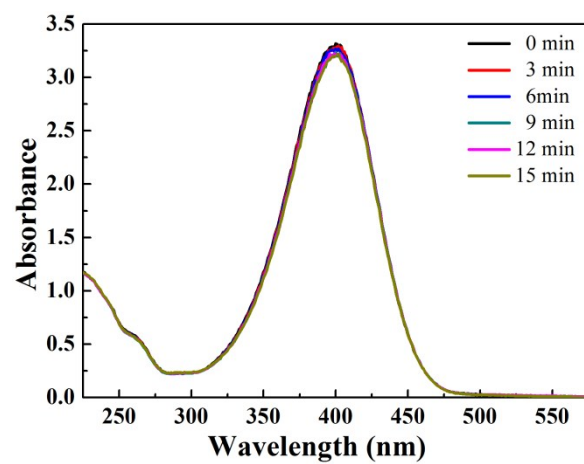

**Fig. S7** Time-dependent UV-vis spectrum for the catalytic reduction of 4-NP by NaBH<sub>4</sub> in the presence of the pristine SrTiO<sub>3</sub>.
